# Supplementary material
Source: PubMed Central journal article supplement (PMC2735994)
Supplement: pp.109.138651_1.pdf [file pp.109.138651_1.pdf]

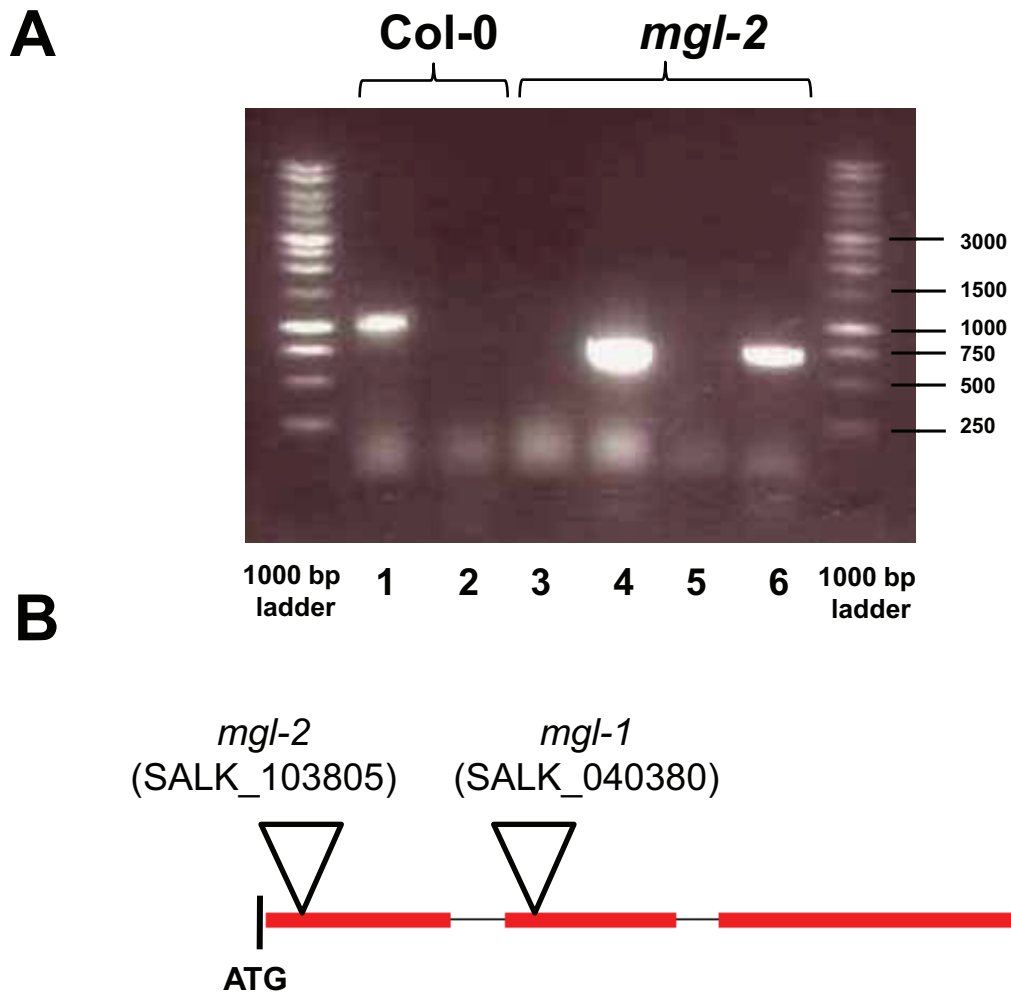

**Supplemental Figure S1: Identification of homozygous *mgl-2* T-DNA insertion**

A. Genotyping homozygous *mgl-2* T-DNA insertions. Gel image showing PCR with genomic DNA of Col-0 and *mgl-2*. Lanes 1, 3, and 5 (amplification with MGL-2 RP and MGL-2 LP, specific for the wildtype allele), Lanes 2, 4 & 6 (amplification with MGL-2 RP and LBa1, specific for the insertion allele). B. Location of T-DNA insertions in the coding region of *MGL*; exons are marked as red blocks and introns as thin lines.
