# Supplementary material
Source: PubMed Central journal article supplement (PMC2735994)
Supplement: pp.109.138651_2.pdf [file pp.109.138651_2.pdf]

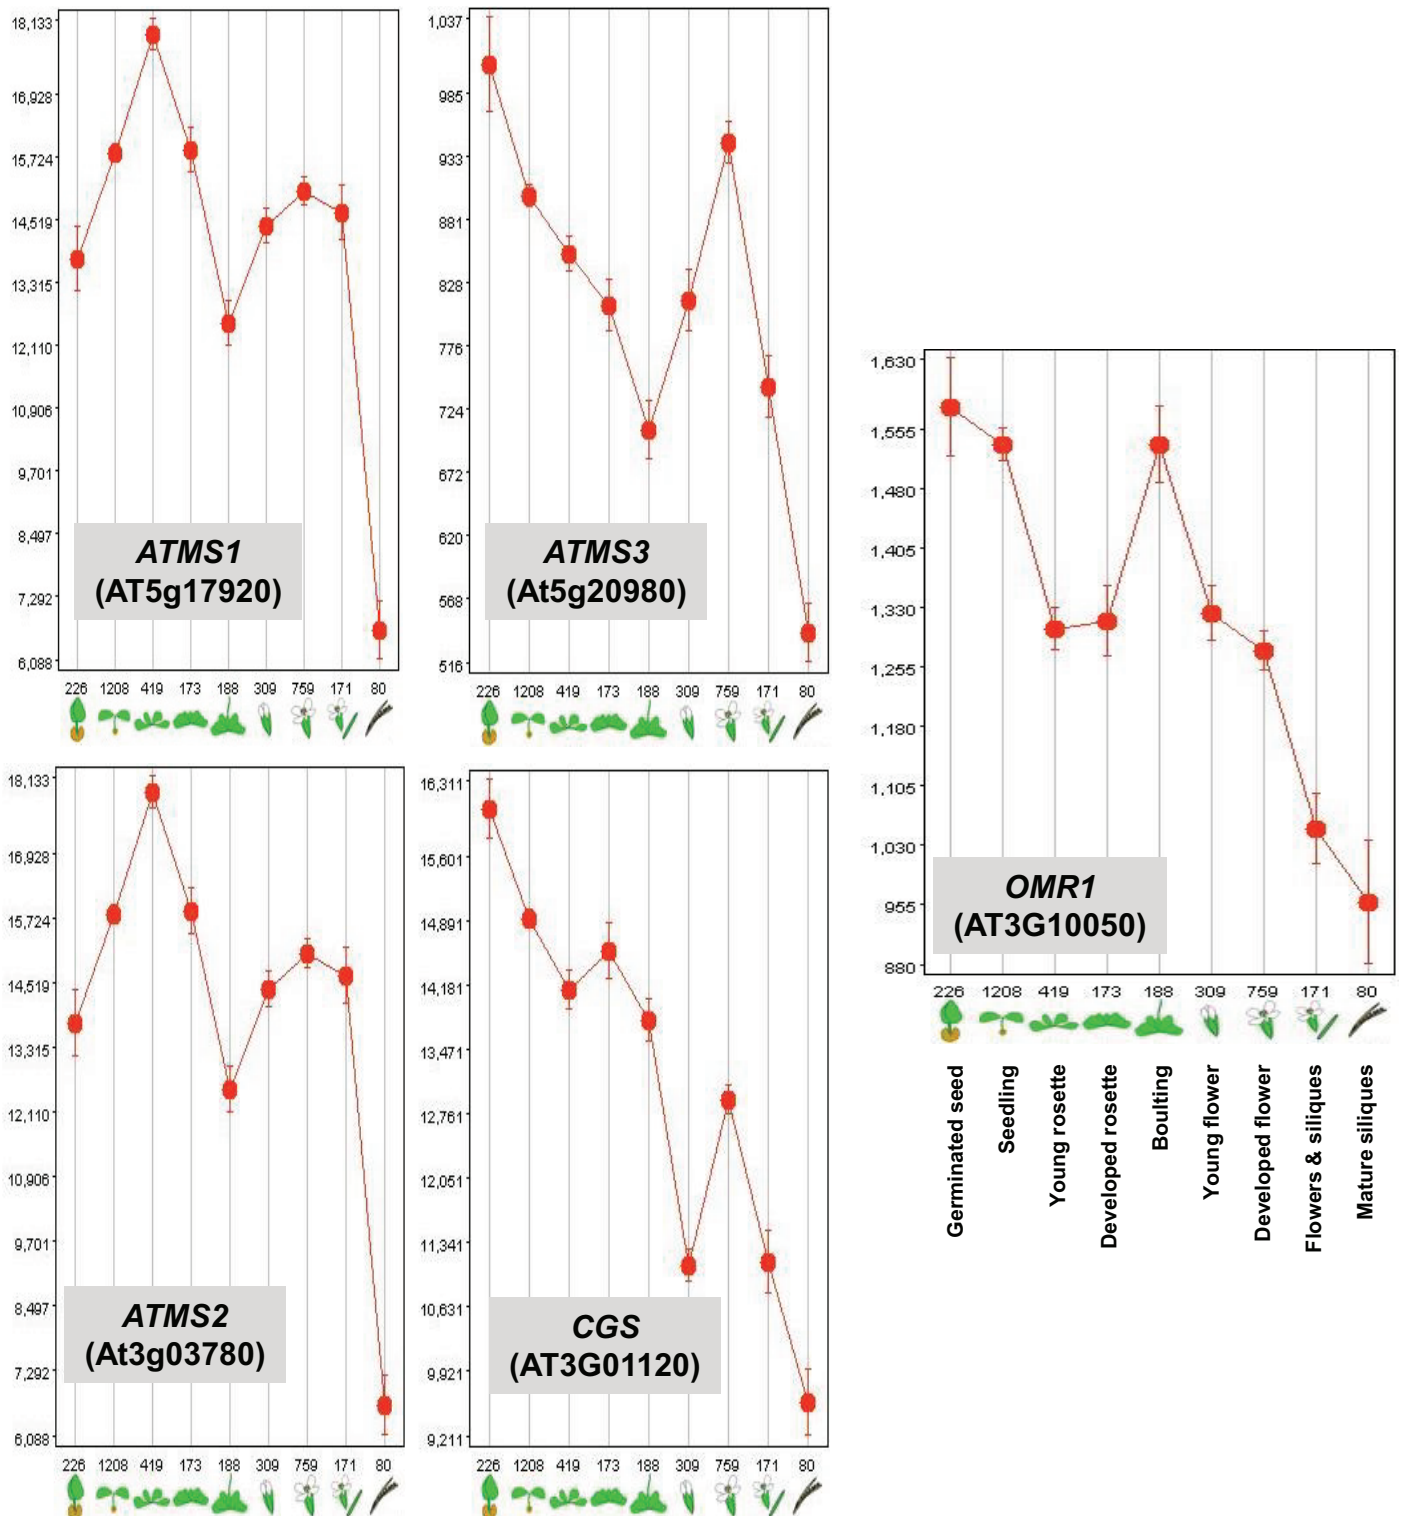

**Supplemental Figure S2: Tissue-specific expression patterns of methionine biosynthetic genes (*ATMS1*, *ATMS2*, *ATMS3* and *CGS*) and threonine deaminase (*OMR1*):** Expression analysis was performed by using publicly available data from the Genevestigator web site ([www.genevestigator.ethz.ch](http://www.genevestigator.ethz.ch)) and plotted to compare gene expression among various tissues for all the genes. Error bars represent standard deviations.
