# Supplementary material
Source: PubMed Central journal article supplement (PMC2735994)
Supplement: pp.109.138651_3.pdf [file pp.109.138651_3.pdf]

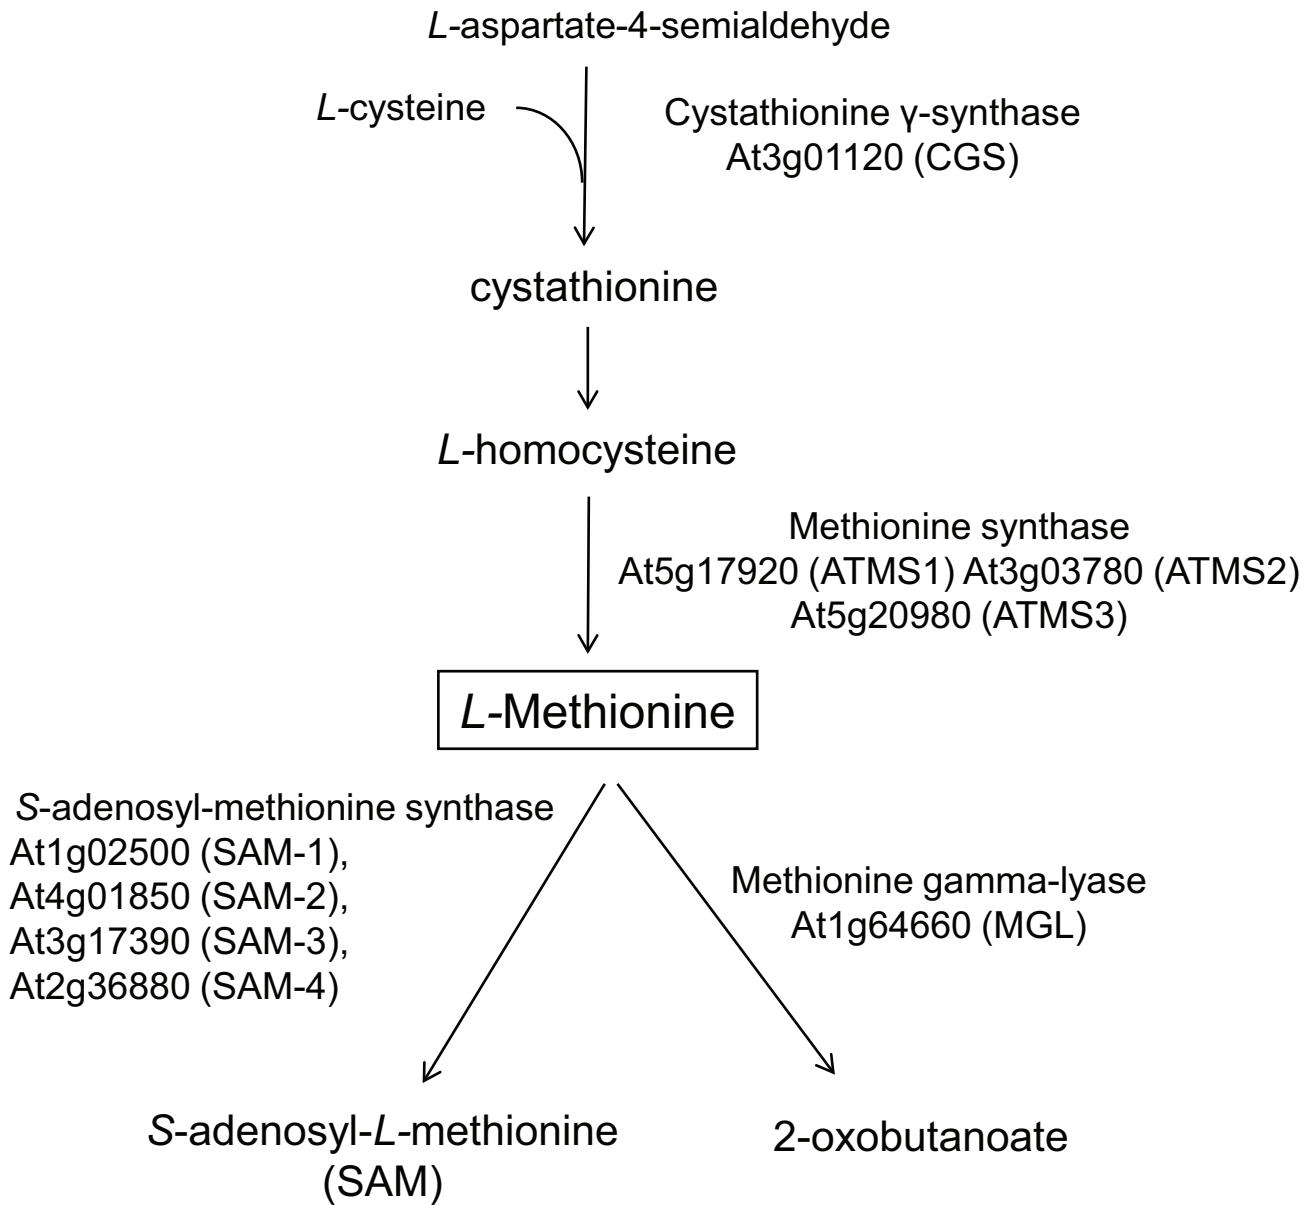

**Supplemental Figure S3** : Pathway showing key proteins involved in the biosynthesis and degradation of methionine in plants.
