# Supplementary material
Source: PubMed Central journal article supplement (PMC2735994)
Supplement: pp.109.138651_4.pdf [file pp.109.138651_4.pdf]

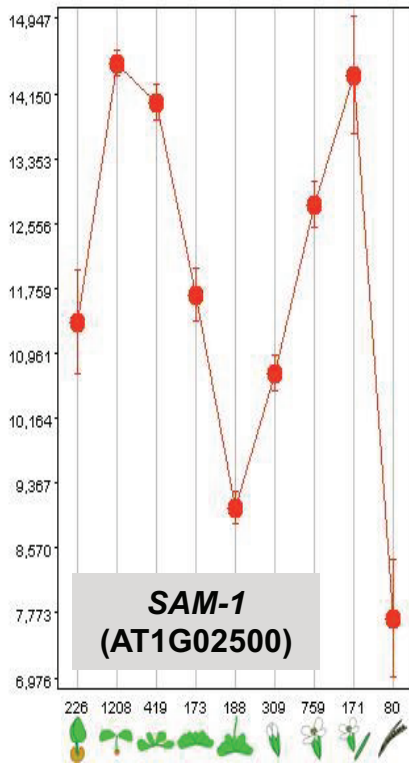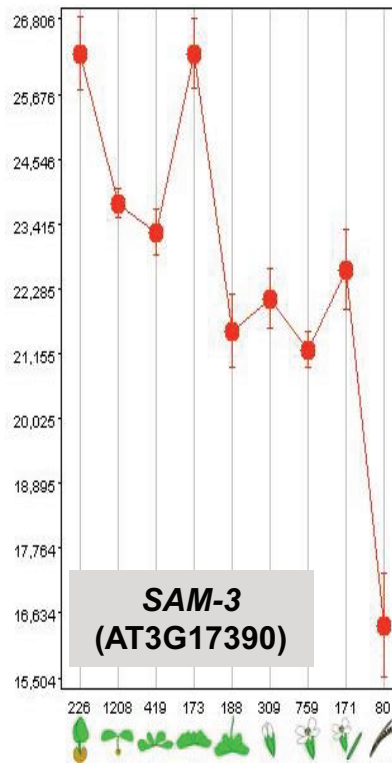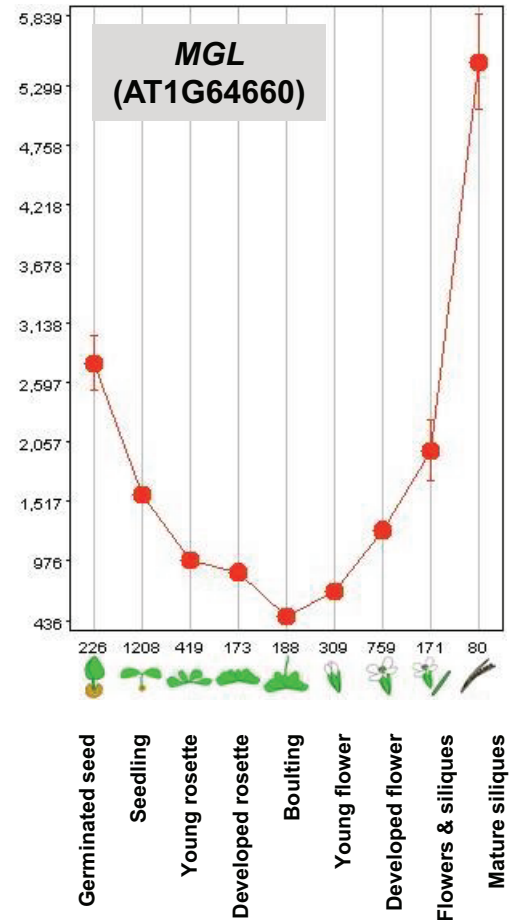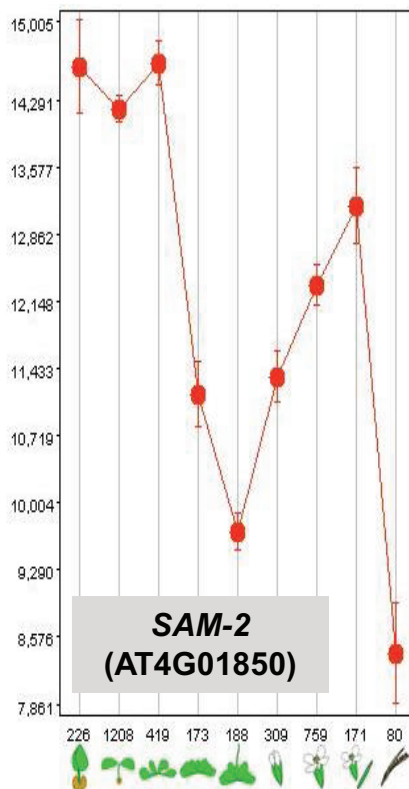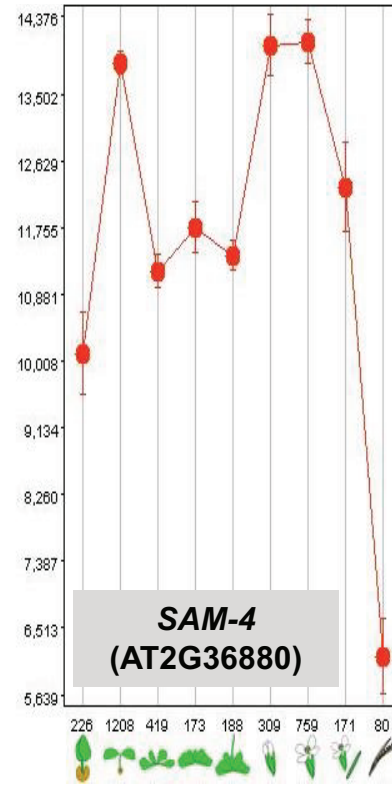

**Supplemental Figure S4: Tissue-specific expression patterns of methionine catabolic genes gamma-lyase (*MGL*) and S-adenosyl-methionine synthases (*SAM-1*, *SAM-2*, *SAM-3*, *SAM-4*):** Expression analysis was performed by using publicly available data from the Genevestigator web site ([www.genevestigator.ethz.ch](http://www.genevestigator.ethz.ch)) and plotted to compare gene expression among various tissues for all the genes. Error bars represent standard deviations.
