# Supplementary material
Source: PubMed Central journal article supplement (PMC2735994)
Supplement: pp.109.138651_5.pdf [file pp.109.138651_5.pdf]

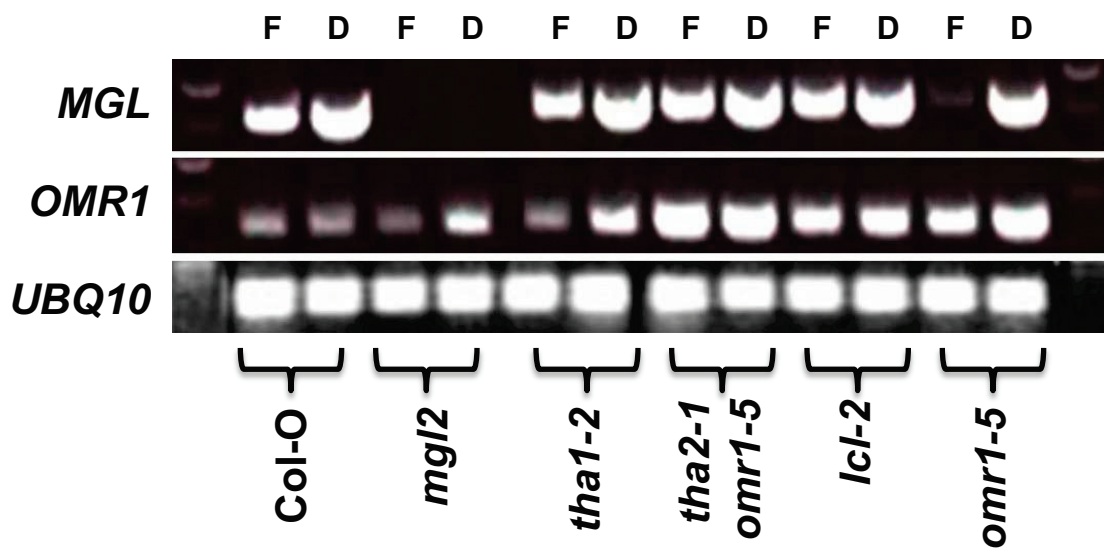

**Supplemental Figure S5: *MGL* and *OMR1* transcription under drought stress.** Semi-quantitative RT-PCR was used to measure expression of *MGL* and *OMR1* in fresh and desiccated flowers from 30-day-old mutant and wildtype plants. *UBQ10* was used as a control for RNA abundance. F: fresh and D: drought stressed.
