# Supplementary material
Source: PubMed Central journal article supplement (PMC2735994)
Supplement: pp.109.138651_6.pdf [file pp.109.138651_6.pdf]

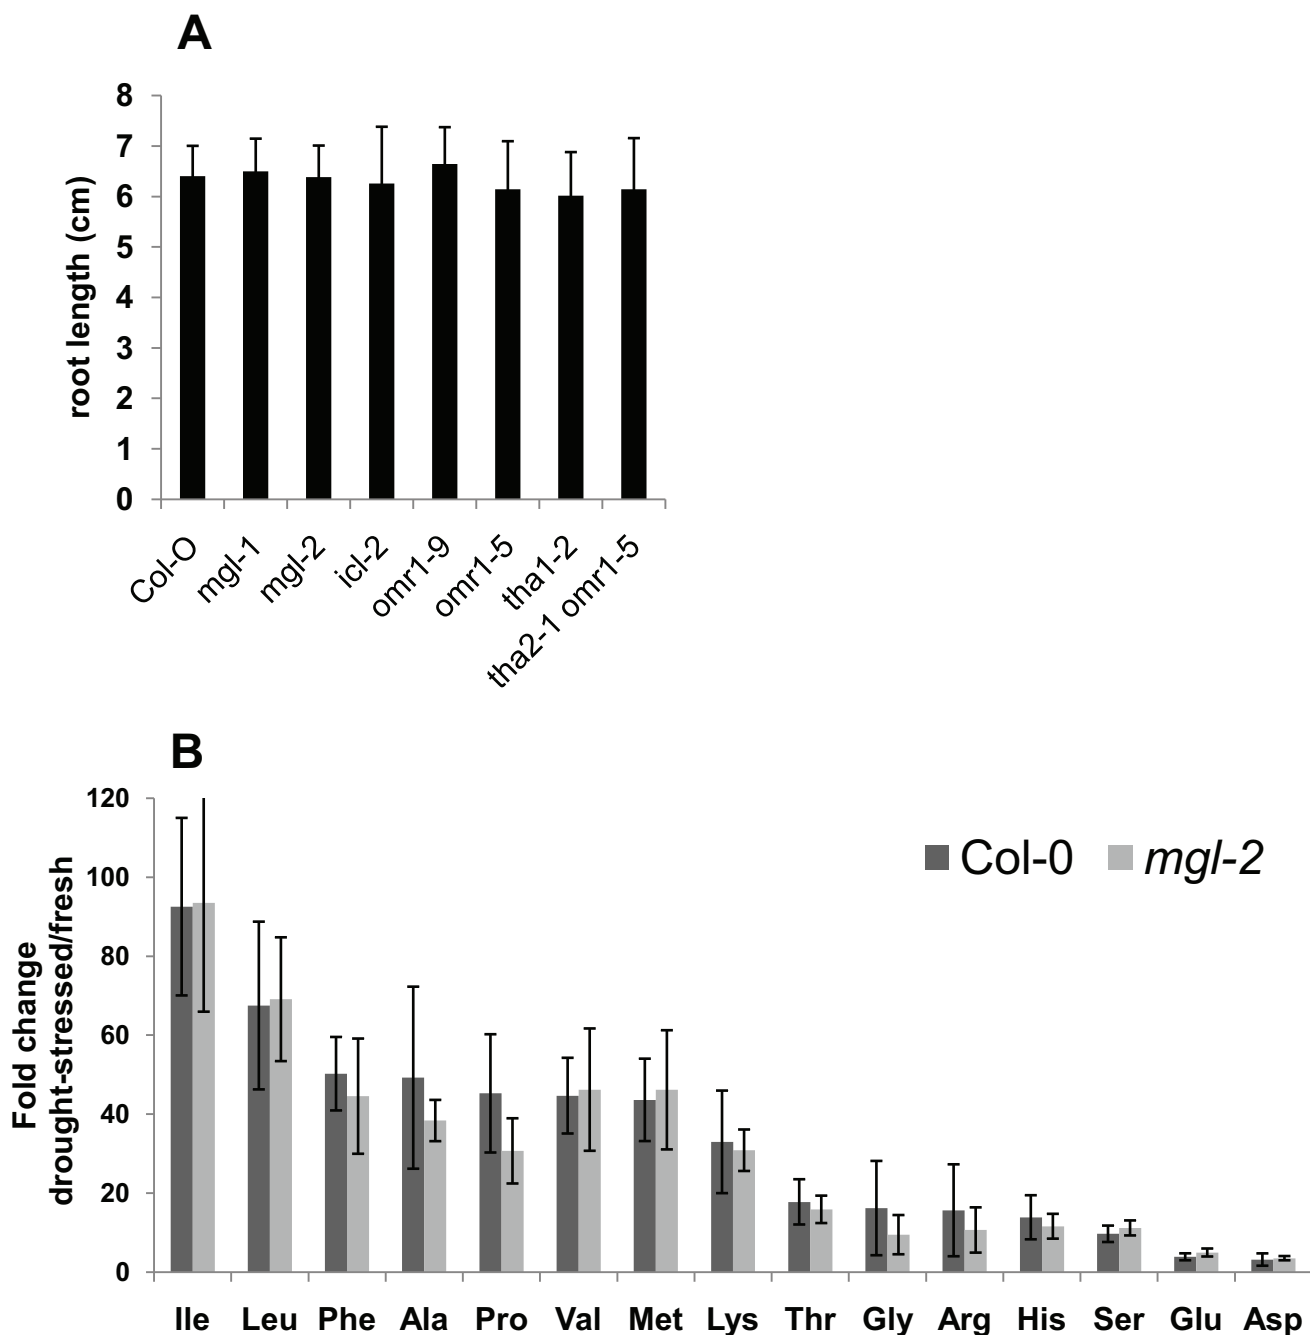

**Supplemental Figure S6: (A) Salt sensitivity of amino acid mutants.** Seeds were planted on MS medium as a control. Roots of 10-day old seedlings were measured. Mean +/- s.d. of n = 7. **(B) Amino acid accumulation in drought-stressed leaves of wild type and *mgl-2*.** Amino acids were quantified from fresh and dehydrated leaves of wild-type Col-0 and *mgl-2*. Fold-change due to dehydration was calculated. Mean +/- s.d. of n = 4 to 6. \* = P < 0.05, relative to wild-type Col-0, Student's t-test. Student's t-test
