# Supplementary material
Source: PubMed Central journal article supplement (PMC2735994)
Supplement: pp.109.138651_7.pdf [file pp.109.138651_7.pdf]

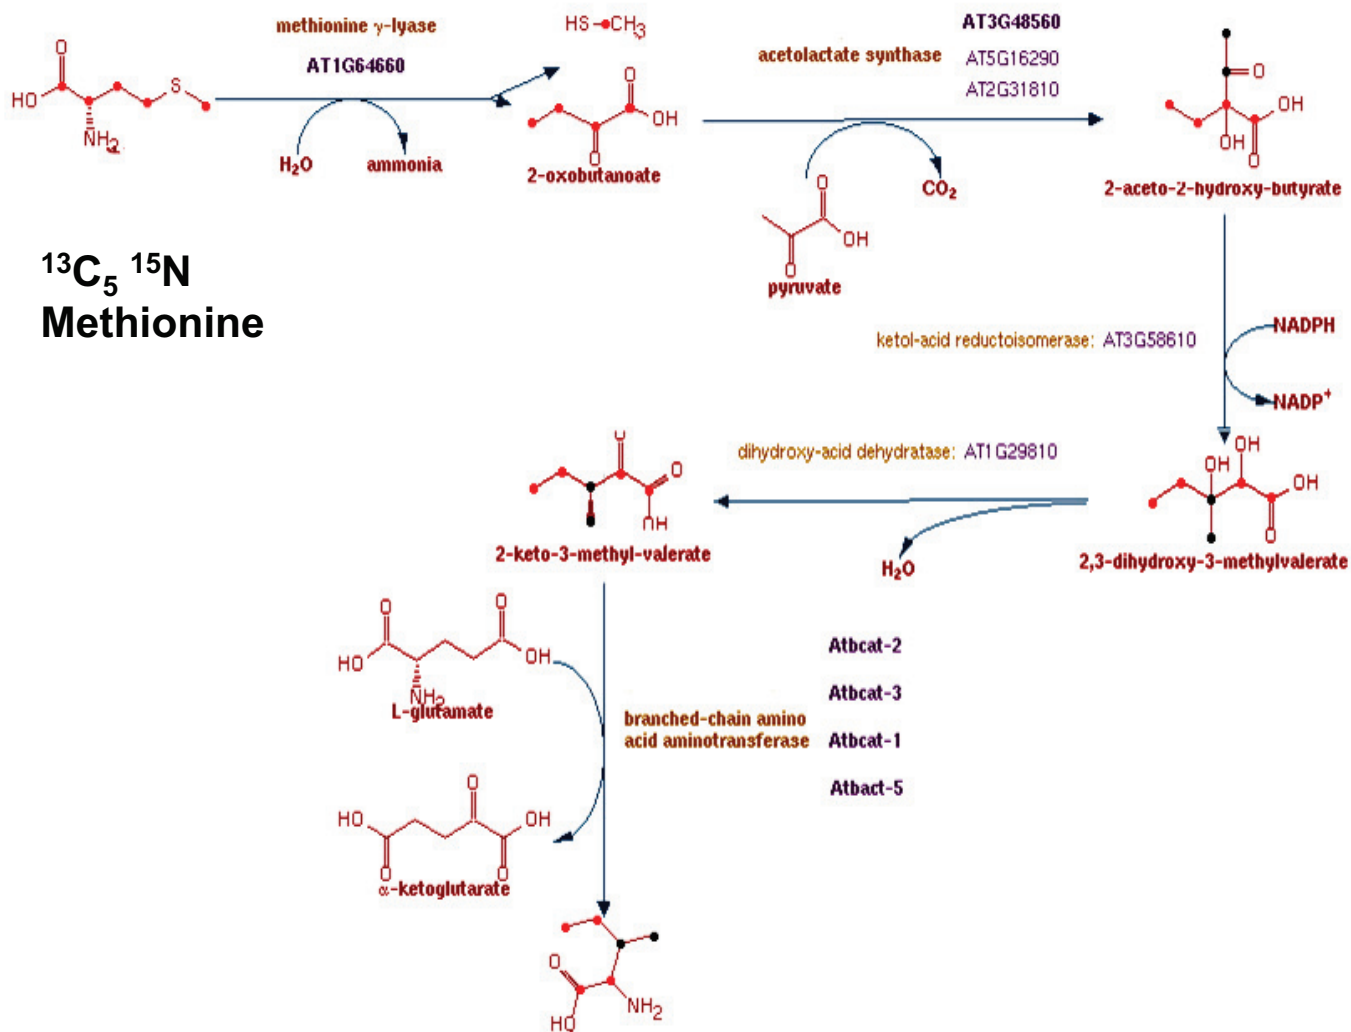

**Supplemental Figure S7: Possible pathway of label incorporation in Ile after feeding the plant tissue [ $^{13}\text{C}_5$   $^{15}\text{N}$ ]Met:** Red dots are  $^{13}\text{C}$  carbons in [ $^{13}\text{C}$ ]Met. Black dots are  $^{12}\text{C}$  carbons derived from pyruvate.  $^{15}\text{N}$  is lost during deamination and one  $^{13}\text{C}$  of [ $^{13}\text{C}_5$   $^{15}\text{N}$ ]Met is utilized in the formation of methanethiol. This pathway is modified from the AraCyc database, <http://www.arabidopsis.org/biocyc/index.jsp>.
