# Supplementary material
Source: PubMed Central journal article supplement (PMC2735994)
Supplement: pp.109.138651_8.pdf [file pp.109.138651_8.pdf]

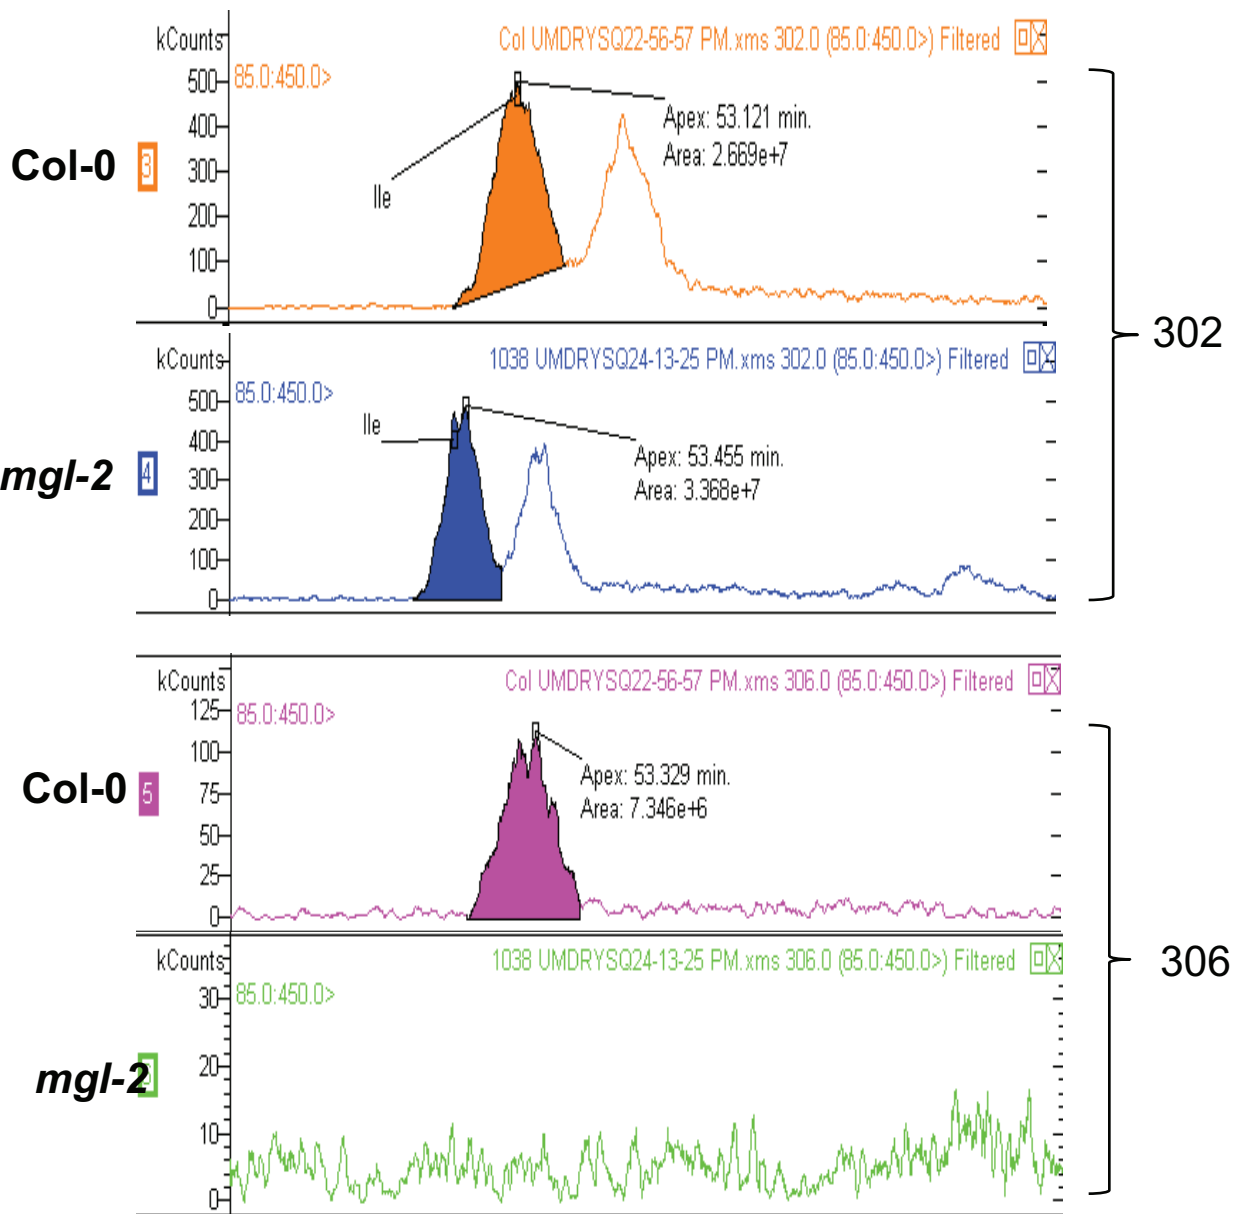

**Supplemental Figure S8:** Detection of derivatized native Ile (m/z 302) and isotopically labeled Ile (m/z 306) in wild type and *mgl* mutant *A. thaliana* siliques.
