# Supplementary material
Source: PubMed Central journal article supplement (PMC2735994)
Supplement: pp.109.138651_10.pdf [file pp.109.138651_10.pdf]

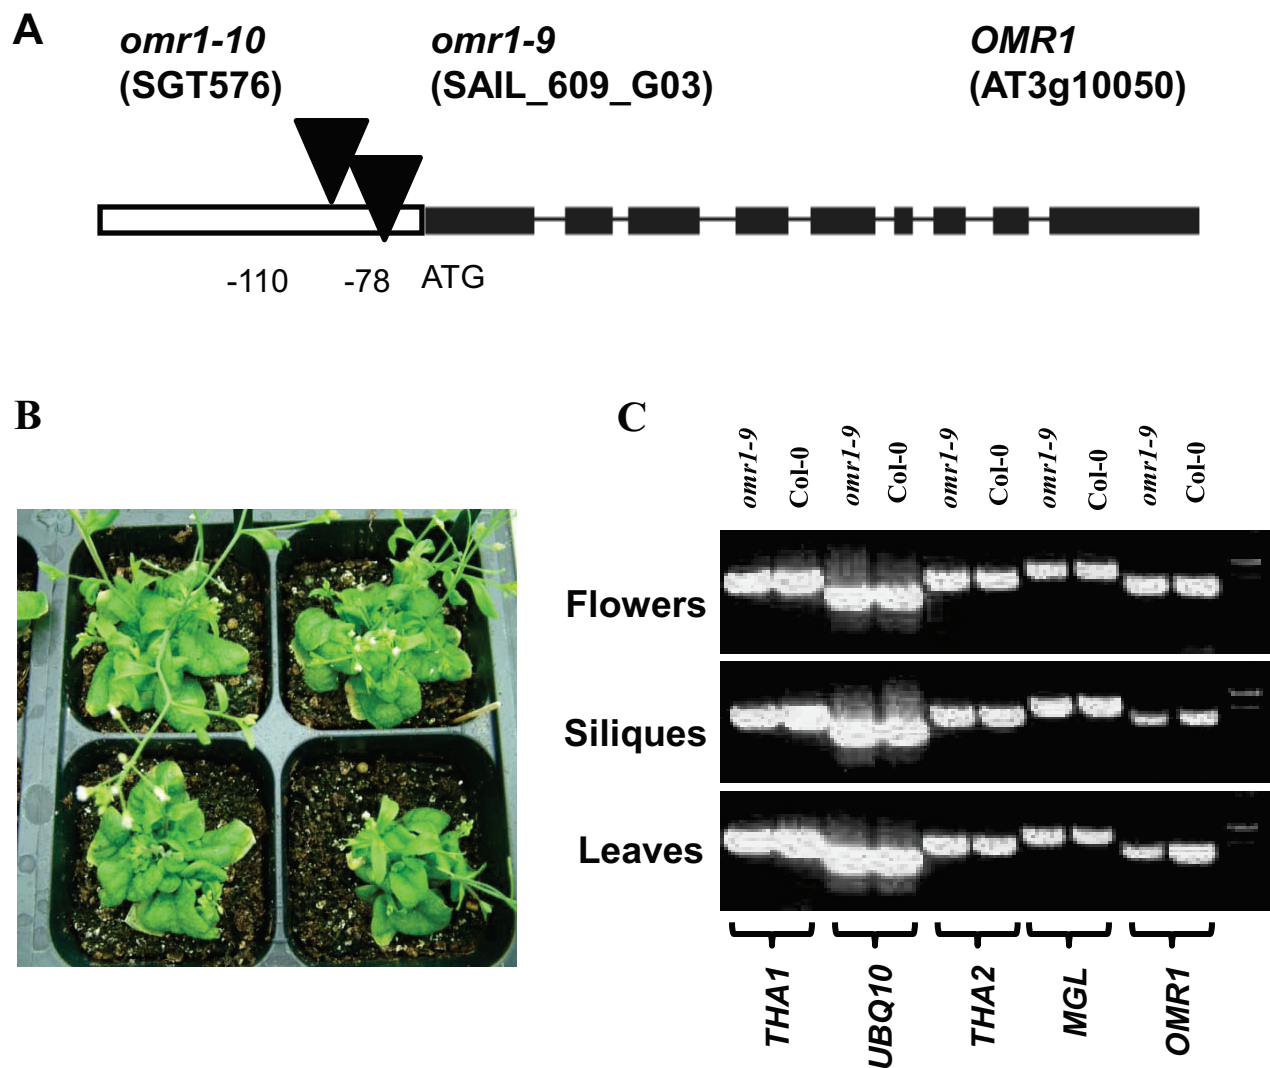

**Supplemental Figure S10: A. Location of knock-down *OMR1* alleles, B. *omr1-9* plants grown on soil and C. Expression profile of *OMR1* in plant tissue by RT-PCR.** (A) Hollow bar is the promoter region of *OMR1*, black filled boxes are exons and thin lines connecting the exons are the introns. *omr1-9* (SAIL\_609\_G03) is a T-DNA insertion located 78 bp upstream of the start codon and *omr1-10* (SGT 576) is a gene trap line inserted at 110 bp before start codon. (B) *omr1-9* plants grown in soil show a bushy appearance and stunted growth. (C) Transcription of *OMR1*, *THA1*, *THA2*, and *MGL* in the flowers, siliques and leaves was compared to Col-0 using RT-PCR. Expression of *UBQ10* was used as a control.
