# Supplementary material
Source: PubMed Central journal article supplement (PMC2735994)
Supplement: pp.109.138651_11.pdf [file pp.109.138651_11.pdf]

A.

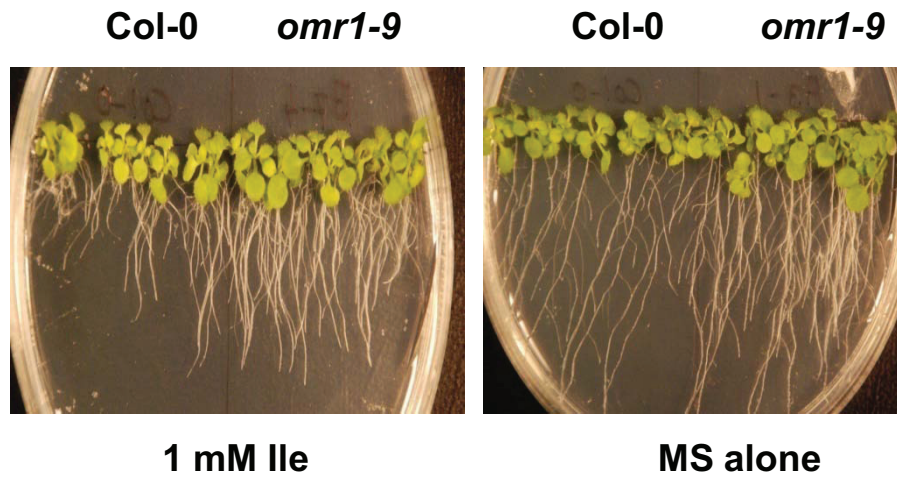

B.

|          | Col-0       | <i>omr1-9</i> |
|----------|-------------|---------------|
| MS alone | 5.5 ± 0.34  | 5.33 ± 0.36   |
| 1 mM Ile | 1.85 ± 0.40 | 3.82 ± 0.12*  |

**Supplemental Figure S11: Ile tolerance of wild-type Col-0 and *omr1-9*.**

Seeds of wild-type Col-0 and *omr1-9* (Thr deaminase knock-down) were surface sterilized and placed on MS agar with or without 1 mM Ile. Root lengths were measured 10-days after germination. (A) representative root growth. (B) Measured root lengths, \* =  $P < 0.05$ , Student's t-test.
