# Supplementary material
Source: PubMed Central journal article supplement (PMC2735994)
Supplement: pp.109.138651_12.pdf [file pp.109.138651_12.pdf]

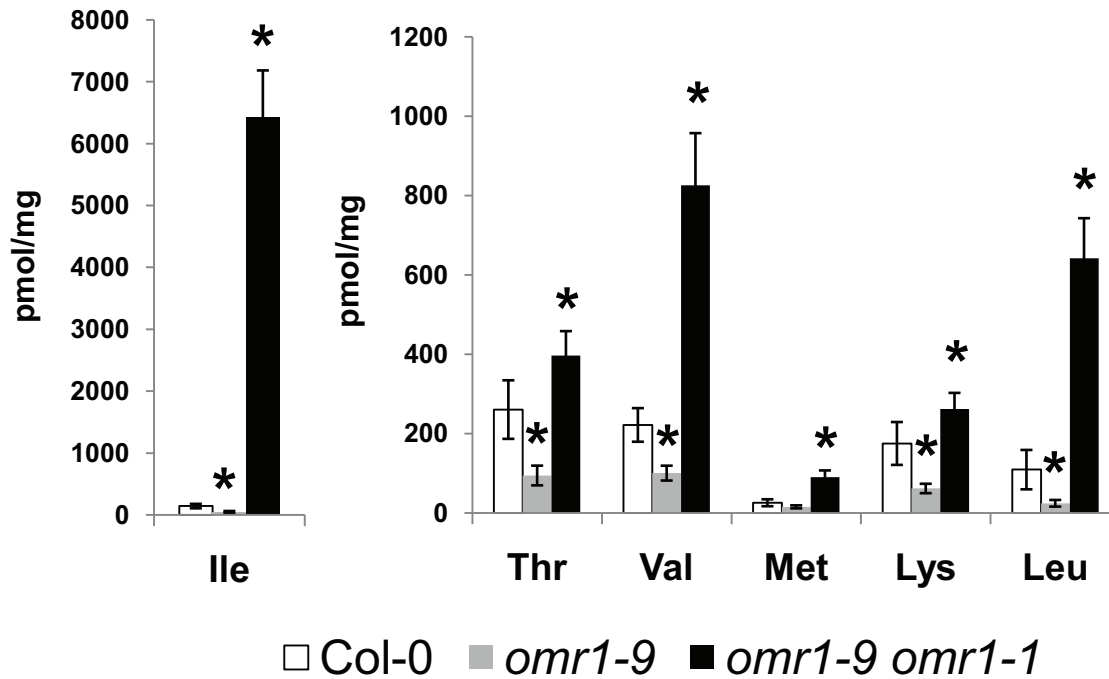

**Supplemental Fig. S12: Rescue of *omr1-9* amino acid deficit by *omr1-1* overexpression.** Seed amino acids were measured in wild-type Col-0, *omr1-9* (*Thr* aldolase knock-down), and *omr1-9 p35S:omr1-1* (feedback insensitive). Only amino acids with significant changes relative to wild-type Col-0 are shown. Mean +/- s.d. of n = 3. \* = p < 0.05 relative to wildtype, Student's t-test.
