# Supplementary material
Source: PubMed Central journal article supplement (PMC2735994)
Supplement: pp.109.138651_13.pdf [file pp.109.138651_13.pdf]

**Supplemental Table S1:** Sequences of oligonucleotide primers used in this study

|           |                                         |
|-----------|-----------------------------------------|
| MGL-2RP   | CTAAAGCAACAAGGCCACAAG                   |
| MGL-2LP   | TGTGTCCTACCCTCAACGATC                   |
| LBa1      | TGGTTCACGTAGTGGGCCATCG                  |
| S609LP    | TTTGCCTTCCTTCAGAGTGTG                   |
| S609RP    | AACAATTCCAGTCACCACTCAG                  |
| Lb3       | TAGCATCTGAATTTTCATAACCAATCTCG           |
| SGT LP    | TCTGCTGGAAGTTTCACCATC                   |
| SGT RP    | TTTGCCTTCCTTCAGAGTGTG                   |
| SGT DS3.2 | CGATTACCGTATTTATCCCGTTC                 |
| WISC LP   | TGGATTATCCACCACAGCTTC                   |
| WISC RP   | ATAACCAGTGGCGCTAACATG                   |
| WISC745   | AACGTCCGCAATGTGTTATTAAGTTGTC            |
| MGL R1    | GCTCATTTCCCTCGAGACACAG                  |
| MGL R2    | AAATTCTCACTCCCACACACG                   |
| OMR1 R1   | GCTGGAGCTGAGGCATACTGT                   |
| OMR1 R2   | CGTATCCAAGAGCTTTAGCTCGGTT               |
| ICL R1    | TAACACTCGGCCTTGCTCATTTGAC               |
| ICL R2    | GCAGAGGGAGGCAAGAATGAGCATG               |
| THA1 R1   | GGAAACAGCTATGACCATGCGTCTTGAAGAGGAGATGGC |
| THA1 R2   | GTAAAACGACGGCCAGTGTGGGAGGTTTTCTTGAGTG   |
| THA2 R1   | GAAAGAGGTGGCTGAGATCG                    |
| THA2 R2   | CCCTCGCTTTCTTATGGTCA                    |
| UBQ1      | GATCTTTGCCGAAAACAATTGGAGGATGGT          |
| UBQ2      | CGACTTGTCATTAGAAAGAAAGAGATAACAGG        |
| PMDC3235S | GGTCTTGCGAAGGATAGTGG                    |
| MGL SEQ   | TTCTTCCCGGAGAATACGAG                    |
| PMDC32NOS | CTGGAAAGCGGGCAGTGAGC                    |
| M13 F     | GTAAAACGACGGCCAGT                       |
| M13R      | AACAGCTATGACCATG                        |
