# Supplementary material
Source: PubMed Central journal article supplement (PMC2735994)
Supplement: pp.109.138651_14.pdf [file pp.109.138651_14.pdf]

**Supplemental Table S2:** Sequences of oligonucleotide primers used for qPCR

|           |                              |
|-----------|------------------------------|
| QMS1 P1   | AGTTCGTCGTGAGTACAAGGCCAA     |
| QMS1 P2   | TCACTCCTTCACGGAACACGGAAA     |
| QMS2 P1   | TTCCACAGGGCAAGTACCTCTTT      |
| QMS2 P2   | ATCCATAGGATTGCACCCATCCGT     |
| QMS3 P1   | ATCATCGCCAAGGGTGACAAATGC     |
| QMS3 P2   | TTGAGTAGCACATGTGGGTGTGGA     |
| QCGS P1   | GTCCGTCAGCTGAGCATTAAAGCC     |
| QCGS P2   | CACTGCAGCTTCAAGCCCTG         |
| QSAMS1 P1 | AGGGCACATGTTTGGTTATGCCAC     |
| QSAMS1 P2 | ATCCCGTTAGCCACAACGCTCTTA     |
| QSAMS2 P1 | ACCAAGATTGGTGCTCGTCTCACT     |
| QSAMS2 P2 | TGTCTGGAATCAACCCTGTTCCGT     |
| QSAMS3 P1 | ATTCGTCTCTGCTGACGTTGGTCT     |
| QSAMS3 P2 | TAGCCCACTGGCTACAATGCTCTT     |
| QSAMS4 P1 | ATCCTGAAAGCAAAGTGGCGTGTG     |
| QSAMS4 P2 | TCAGGGACACCAATGGCGTATGAT     |
| QUBQ10 P1 | AAAGAGATAACAGGAACGGAAACATAGT |
| QUBQ10 P2 | GGCCTTGTATAATCCCTGATGAATAAG  |
| QMGL P1   | TGCTCTCTCATTTCCTTGCCACGGA    |
| QMGL P2   | AACCTGTGTCCTACCCTCAACGAT     |
| QOMR P1   | TCCGAATTCGTTGCAATACCCTGC     |
| QOMR P2   | TGGTGACTIONCAATGGCGATGTCGTA  |
